# Supplementary material for: Solvent induced reactivity of 3,5-dimethylpyrazole towards zinc (II) carboxylates
Source: Royal Society of Chemistry journal article supplement (doi:10.1039/b905534g), 2009-01-01
Supplement: b905534g.pdf [file b905534g.pdf]

**Supplementary materials**

**Solvent induced reactivity of 3, 5-dimethylpyrazole towards zinc (II) carboxylates**

Rupam Sarma, Dipjyoti Kalita and Jubaraj B. Baruah\*

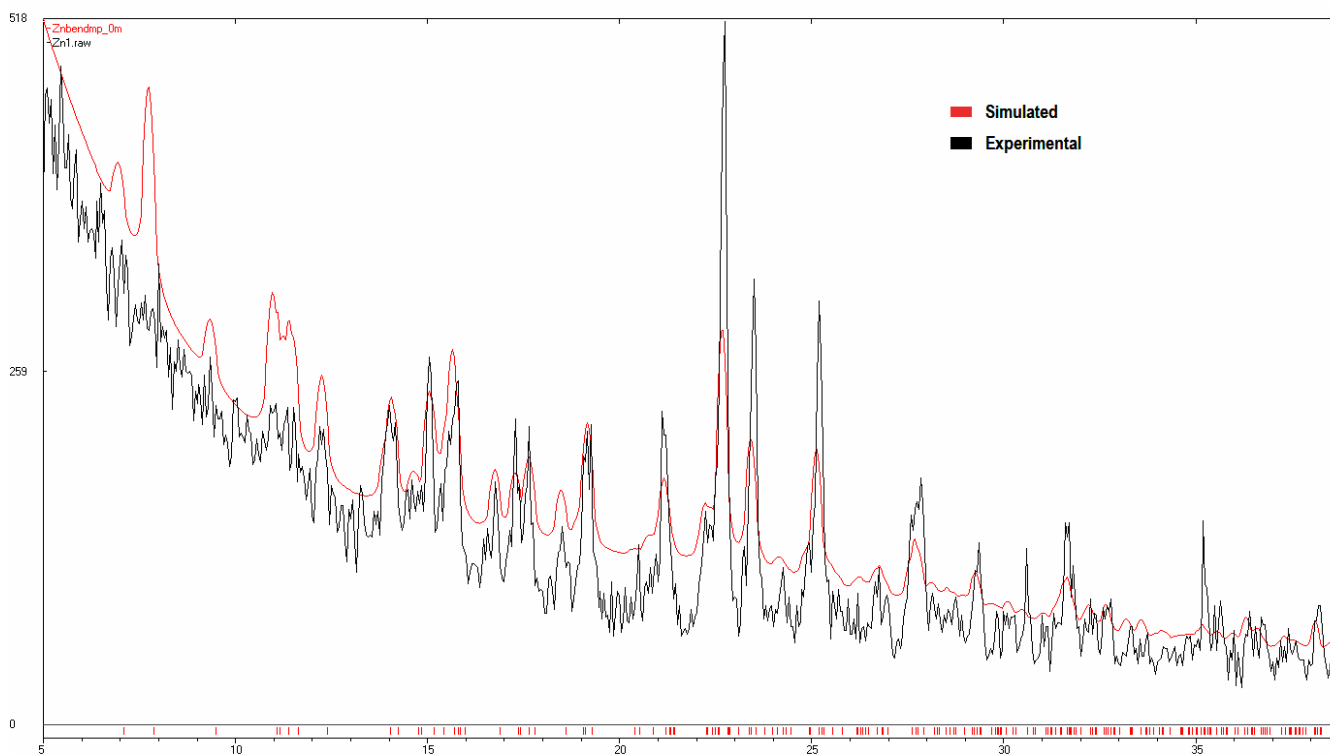

Fig: Simulated and experimental PXRD patterns for Complex 1

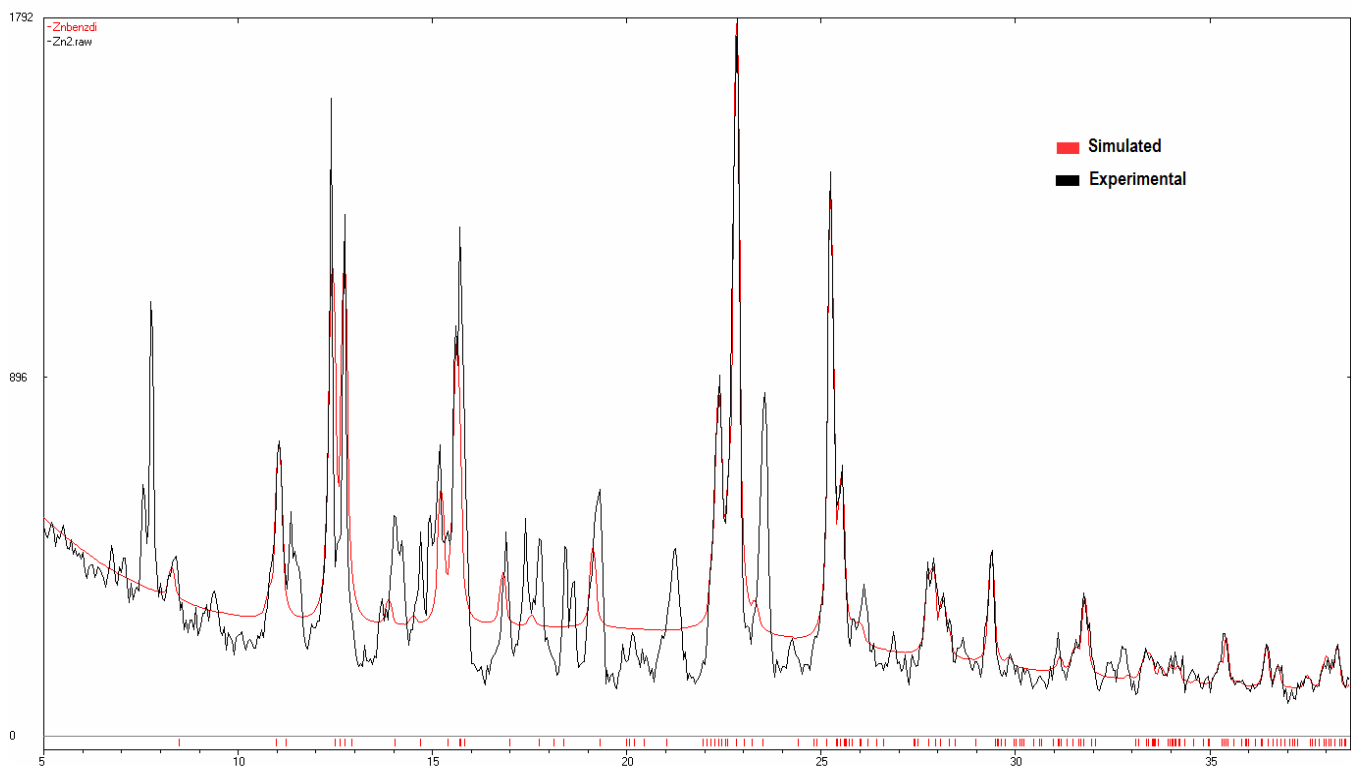

Fig: Simulated and experimental PXRD patterns for Complex 2

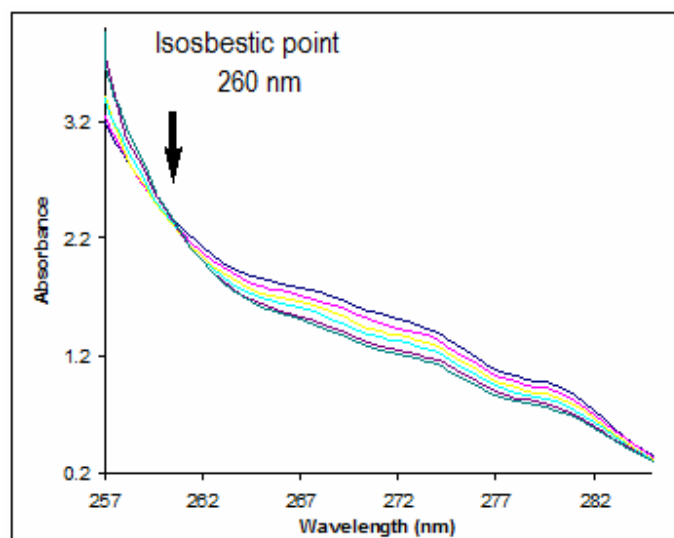

Fig: Ultraviolet absorption spectra of complex **3** in methanol ( $10^{-3}$  M) upon addition of dimethylformamide (100 $\mu$ l per aliquot).

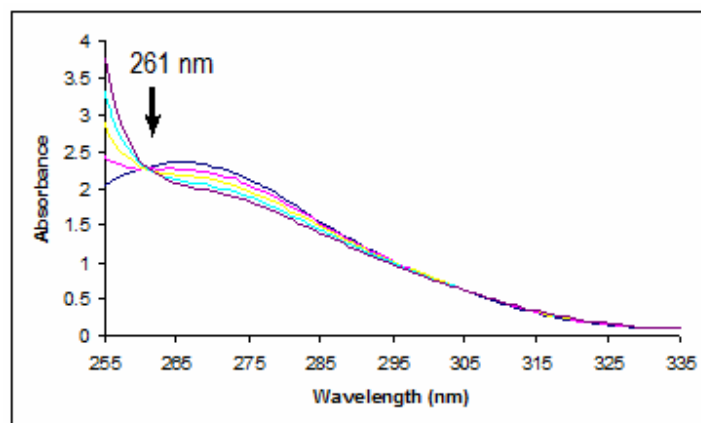

Fig: Ultraviolet absorption spectra of complex **6** in methanol ( $10^{-3}$  M) upon addition of dimethylformamide (100 $\mu$ l per aliquot).
